# Supplementary material for: Metabolome and Lipidome Profiles of Populus × canescens Twig Tissues During Annual Growth Show Phospholipid-Linked Storage and Mobilization of C, N, and S
Source: Front Plant Sci. 2018 Sep 5;9:1292. doi: 10.3389/fpls.2018.01292 (PMC6133996; doi:10.3389/fpls.2018.01292)
Supplement: TABLE S3 — Heat map of lipid changes in each tissue of poplar during annual growth. [file Table_3.XLSX]

## Sheet: Supplemental Table III
																					Supplemental Table III
																					Color code, "-5--0--5"	Normalization_each lipid class (e.g. Cell "X7"= LOG(D7/AVERAGE(D7:T53),2))																		Color code, "-3--0--3"	Normalization_all tissues_each metabolite (e.g. Cell "AQ7"=LOG(D7/AVERAGE(D7:T7),2))
			Average (from Supplemental Table II)
			Jan	Mar	Apr	Jul	Sep		Jan	Mar	Apr	Jul	Sep		Jan	Mar	Apr	Jul	Sep			Jan	Mar	Apr	Jul	Sep		Jan	Mar	Apr	Jul	Sep		Jan	Mar	Apr	Jul	Sep			Jan	Mar	Apr	Jul	Sep		Jan	Mar	Apr
	Compound_Class	Compound_Name	buds		leaves				bark						wood							buds		leaves				bark						wood							buds		leaves				bark
	Triacylglyceride	TAG 48:0	0.00238912	0.00199072	0.00440885	0.00650777	0.00366428		0.00345638	0.00417725	0.00234755	0.00376502	0.00373422		0.00379449	0.00404047	0.00262155	0.0027185	0.00348696		TAG 48:0	-7.37261	-7.63579	-6.48868	-5.92692	-6.75555		-6.83982	-6.56653	-7.39793	-6.71643	-6.72828		-6.70518	-6.61456	-7.23866	-7.18627	-6.82711		TAG 48:0	-0.567357	-0.830542	0.316569	0.878328	0.0496967		-0.034573	0.238719	-0.592679
		TAG 48:1	0.00163657	0.00112347	0.000743711	0.00727585	0.00263065		0.00451599	0.00337259	0.000677629	0.00252096	0.00438043		0.00476128	0.00475725	0.0013619	0.00177424	0.00177834		TAG 48:1	-7.91841	-8.46112	-9.05627	-5.76597	-7.23367		-6.45404	-6.87523	-9.19052	-7.29511	-6.49801		-6.37774	-6.37896	-8.18346	-7.80188	-7.79855		TAG 48:1	-0.81909	-1.3618	-1.95695	1.33335	-0.134347		0.645276	0.224089	-2.0912
		TAG 50:0	0.00121567	0.000987438	0.00186845	0.00190223	0.00161682		0.00144928	0.00144277	0.00124466	0.0017758	0.00201752		0.00173184	0.00162386	0.00124075	0.00152411	0.00184833		TAG 50:0	-8.34733	-8.64732	-7.72724	-7.70139	-7.93592		-8.09375	-8.10025	-8.31333	-7.80061	-7.6165		-7.83678	-7.92966	-8.31787	-8.02112	-7.74286		TAG 50:0	-0.365301	-0.665295	0.254788	0.280638	0.0461068		-0.111724	-0.11822	-0.3313
		TAG 50:1	0.00949502	0.0125878	0.011365	0.00538009	0.00502327		0.00404802	0.00708014	0.00475071	0.0747028	0.0469534		0.0284775	0.0108061	0.00351111	0.0436739	0.0646473		TAG 50:1	-5.38191	-4.97513	-5.12256	-6.20146	-6.30046		-6.61187	-5.80531	-6.38094	-2.406	-3.07593		-3.79734	-5.19531	-6.81716	-3.18038	-2.61457		TAG 50:1	-1.22316	-0.816378	-0.963805	-2.0427	-2.1417		-2.45311	-1.64655	-2.22219
		TAG 50:2 (2)	0.206983	0.190839	0.0652362	0.0859035	0.084243		0.321756	0.374437	0.0738828	0.498703	0.387701		0.899687	0.573413	0.17642	0.467501	0.467783		TAG 50:2 (2)	-0.935717	-1.05287	-2.60149	-2.20444	-2.2326		-0.299261	-0.0805065	-2.42192	0.33295	-0.0302855		1.18419	0.534346	-1.16621	0.239739	0.240611		TAG 50:2 (2)	-0.650776	-0.76793	-2.31654	-1.9195	-1.94766		-0.0143203	0.204434	-2.13698
		TAG 50:3 (1)	0.163704	0.224202	0.074202	0.204302	0.159336		0.219194	0.324201	0.0754517	0.17408	0.101757		0.557417	0.402953	0.125473	0.164222	0.162754		TAG 50:3 (1)	-1.27414	-0.820428	-2.4157	-0.954525	-1.31315		-0.853024	-0.288339	-2.3916	-1.18548	-1.9601		0.493528	0.025383	-1.65785	-1.26958	-1.28254		TAG 50:3 (1)	-0.351607	0.102103	-1.49317	-0.0319933	-0.390621		0.0695074	0.634192	-1.46907
		TAG 50:4	0.0708276	0.0266038	0.0160222	0.00196785	0.0025153		0.135619	0.0857147	0.0110457	0.0796498	0.104674		0.220183	0.176601	0.0540399	0.115303	0.114072		TAG 50:4	-2.48285	-3.89553	-4.62708	-7.65247	-7.29835		-1.54567	-2.20762	-5.16367	-2.31349	-1.91932		-0.846529	-1.16474	-2.87313	-1.7798	-1.79528		TAG 50:4	-0.193419	-1.6061	-2.33766	-5.36304	-5.00893		0.743753	0.0818118	-2.87424
		TAG 52:0	0.000895834	0.00069033	0.0011455	0.00167292	0.00118121		0.000905914	0.000902638	0.000612531	0.00094321	0.00109908		0.0013657	0.00139682	0.000929098	0.00125625	0.00137809		TAG 52:0	-8.78778	-9.16373	-8.43311	-7.88672	-8.38882		-8.77164	-8.77687	-9.33623	-8.71344	-8.49278		-8.17945	-8.14694	-8.73518	-8.29996	-8.16642		TAG 52:0	-0.28524	-0.661186	0.0694334	0.615826	0.113723		-0.269097	-0.274324	-0.833688
		TAG 52:1	0.00275546	0.00266492	0.00316744	0.00217944	0.00217876		0.00233611	0.00274701	0.00219012	0.0388474	0.0300156		0.0153238	0.00563081	0.00216737	0.0370256	0.0568283		TAG 52:1	-7.16679	-7.21499	-6.96577	-7.50513	-7.50558		-7.40498	-7.17122	-7.49808	-3.34934	-3.72144		-4.69139	-6.13574	-7.51314	-3.41863	-2.80055		TAG 52:1	-2.31772	-2.36592	-2.1167	-2.65606	-2.65651		-2.55591	-2.32215	-2.64901
		TAG 52:2	0.0419786	0.0547172	0.0242294	0.0318095	0.0178288		0.0748664	0.0666765	0.0231531	0.324946	0.307992		0.331821	0.140448	0.0491985	0.357098	0.48468		TAG 52:2	-3.2375	-2.85516	-4.0304	-3.6377	-4.47295		-2.40284	-2.56998	-4.09595	-0.285027	-0.362338		-0.254826	-1.49519	-3.00854	-0.148909	0.291804		TAG 52:2	-1.88853	-1.5062	-2.68143	-2.28873	-3.12398		-1.05387	-1.22101	-2.74699
		TAG 52:3 (1)	0.167665	0.171002	0.079166	0.0480333	0.0403747		0.119208	0.123437	0.0390578	1.122	1.10558		0.72438	0.355837	0.101866	1.05771	1.55184		TAG 52:3 (1)	-1.23965	-1.21121	-2.32228	-3.04312	-3.29371		-1.73175	-1.68145	-3.34155	1.50278	1.4815		0.871518	-0.154012	-1.95856	1.41765	1.97068		TAG 52:3 (1)	-1.43651	-1.40808	-2.51914	-3.23998	-3.49057		-1.92861	-1.87832	-3.53841
		TAG 52:4	1.53474	0.749375	0.307392	0.167455	0.301183		2.10346	1.94943	0.504287	3.26106	3.51074		3.76359	2.91095	1.23033	3.48199	3.86658		TAG 52:4	1.95469	0.920459	-0.365148	-1.24146	-0.394588		2.40947	2.29975	0.349017	3.04204	3.14847		3.24881	2.87819	1.63574	3.13661	3.28776		TAG 52:4	-0.364713	-1.39895	-2.68455	-3.56087	-2.714		0.090059	-0.019655	-1.97039
		TAG 52:5	1.64042	1.0734	0.40327	0.471874	0.656784		1.7166	1.97259	0.637238	2.62126	2.34684		3.3443	2.79467	1.26361	2.94652	3.11584		TAG 52:5	2.05077	1.43889	0.0265153	0.253172	0.73019		2.11626	2.31679	0.686602	2.72696	2.56742		3.0784	2.81938	1.67425	2.89571	2.97632		TAG 52:5	-0.134209	-0.746087	-2.15846	-1.9318	-1.45478		-0.0687197	0.131815	-1.49837
		TAG 52:6	0.597098	0.534287	0.176048	0.418312	0.456774		0.468238	0.781712	0.254513	0.717477	0.465395		1.42867	1.22058	0.466677	1.068	1.19289		TAG 52:6	0.592738	0.432385	-1.16926	0.0793505	0.206252		0.242012	0.981408	-0.63749	0.857703	0.233227		1.85137	1.62426	0.237196	1.43161	1.59116		TAG 52:6	-0.194153	-0.354506	-1.95615	-0.707541	-0.580639		-0.544879	0.194517	-1.42438
		TAG 52:7	0.00230896	0.00181348	0.000833559	0.0112711	0.00545118		0.0292307	0.0183123	0.00435452	0.00453892	0.0031836		0.00828612	0.0119204	0.00505965	0.00691453	0.00466179		TAG 52:7	-7.42184	-7.77032	-8.89173	-5.13453	-6.18252		-3.75967	-4.43434	-6.50657	-6.44674	-6.95842		-5.57839	-5.05372	-6.29005	-5.83945	-6.4082		TAG 52:7	-1.77023	-2.11871	-3.24012	0.517079	-0.530905		1.89194	1.21727	-0.85496
		TAG 54:0	0.000886931	0.000897999	0.00114608	0.00150495	0.00116666		0.00151786	0.00120719	0.000895582	0.00119876	0.00162224		0.00126028	0.00131913	0.00105174	0.00110875	0.00117352		TAG 54:0	-8.80219	-8.7843	-8.43238	-8.03937	-8.40671		-8.02705	-8.35743	-8.78819	-8.36754	-7.9311		-8.29534	-8.2295	-8.55631	-8.48015	-8.39824		TAG 54:0	-0.432743	-0.414851	-0.0629282	0.33008	-0.0372584		0.342398	0.0120138	-0.41874
		TAG 54:1	0.00113571	0.000886636	0.00106171	0.000841237	0.000636009		0.000891124	0.000959981	0.00062437	0.0166715	0.0152466		0.00896161	0.00262878	0.000836541	0.019362	0.031201		TAG 54:1	-8.4455	-8.80267	-8.54269	-8.8785	-9.28197		-8.79539	-8.68801	-9.30861	-4.56977	-4.69867		-5.46533	-7.23469	-8.88658	-4.35393	-3.66556		TAG 54:1	-2.58116	-2.93834	-2.67836	-3.01417	-3.41763		-2.93106	-2.82368	-3.44428
		TAG 54:2	0.026348	0.0177271	0.00718766	0.00628426	0.00719784		0.0595595	0.0494489	0.0110127	0.167269	0.179075		0.237431	0.113871	0.0341308	0.214494	0.297929		TAG 54:2	-3.90947	-4.4812	-5.78356	-5.97734	-5.78152		-2.73283	-3.00122	-5.16799	-1.24306	-1.14466		-0.737721	-1.79783	-3.53608	-0.88429	-0.410261		TAG 54:2	-1.85425	-2.42598	-3.72834	-3.92212	-3.7263		-0.677607	-0.945999	-3.11277
		TAG 54:3	0.0530997	0.0753862	0.0266316	0.0189834	0.0198114		0.0842494	0.0782217	0.0252326	0.429907	0.511431		0.50063	0.218433	0.0669171	0.587143	0.871566		TAG 54:3	-2.89845	-2.39286	-3.89402	-4.38242	-4.32083		-2.23249	-2.33959	-3.97187	0.118796	0.36931		0.338515	-0.858039	-2.56478	0.568483	1.13838		TAG 54:3	-2.16323	-1.65764	-3.1588	-3.6472	-3.5856		-1.49727	-1.60437	-3.23665
		TAG 54:4	0.2559	0.154701	0.0633112	0.0241178	0.0401936		0.528658	0.320066	0.0718593	1.40416	1.70779		1.84649	0.925862	0.296978	1.80108	2.24348		TAG 54:4	-0.62965	-1.35575	-2.6447	-4.03706	-3.30019		0.417107	-0.306861	-2.46198	1.82641	2.10883		2.22148	1.22557	-0.414872	2.18556	2.50244		TAG 54:4	-1.606	-2.3321	-3.62105	-5.01341	-4.27654		-0.559243	-1.28321	-3.43833
		TAG 54:5	0.581243	0.418806	0.144451	0.0706901	0.0928946		0.921893	0.474508	0.126016	2.40013	2.93391		2.91338	1.81373	0.700206	2.62063	3.26045		TAG 54:5	0.553912	0.081054	-1.45464	-2.48565	-2.09156		1.21937	0.261204	-1.65162	2.59981	2.88953		2.87939	2.19565	0.82255	2.72661	3.04177		TAG 54:5	-1.15929	-1.63215	-3.16785	-4.19886	-3.80477		-0.493837	-1.452	-3.36483
		TAG 54:6	1.90776	0.864015	0.222598	0.0785596	0.115049		3.37841	2.12555	0.611286	3.29032	3.74154		3.86445	3.61174	2.40231	3.53278	3.69288		TAG 54:6	2.26858	1.12583	-0.830785	-2.33337	-1.78298		3.09304	2.42454	0.626618	3.05493	3.24033		3.28696	3.18939	2.60112	3.1575	3.22144		TAG 54:6	-0.224697	-1.36745	-3.32406	-4.82665	-4.27626		0.599765	-0.0687415	-1.86666
		TAG 54:7	2.3771	1.23456	0.32592	0.11812	0.290997		3.28094	2.36602	0.883046	3.33063	3.59973		3.79979	3.59053	2.50304	3.56412	3.73234		TAG 54:7	2.5859	1.6407	-0.280713	-1.74498	-0.444223		3.05081	2.57916	1.15726	3.07249	3.18459		3.26262	3.1809	2.66038	3.17024	3.23678		TAG 54:7	0.0269408	-0.918266	-2.83968	-4.30394	-3.00319		0.491847	0.0201997	-1.4017
		TAG 54:8	1.63458	0.956992	0.27138	0.204896	0.420821		2.01305	1.53569	0.61744	2.32323	2.3963		3.27291	2.72322	1.57197	2.68608	2.95961		TAG 54:8	2.04562	1.27328	-0.544916	-0.950336	0.0879787		2.34608	1.95558	0.641069	2.55283	2.59751		3.04727	2.78201	1.98928	2.7622	2.9021		TAG 54:8	-0.0615912	-0.833936	-2.65213	-3.05755	-2.01923		0.238867	-0.151632	-1.46614
		TAG 54:9	0.474051	0.318969	0.0771634	0.12494	0.231156		0.486741	0.432846	0.195519	0.724691	0.628252		1.42223	0.96665	0.416614	0.958338	1.28959		TAG 54:9	0.259812	-0.311815	-2.35924	-1.664	-0.776362		0.297926	0.128626	-1.01792	0.872137	0.666113		1.84486	1.28776	0.0734831	1.2753	1.70361		TAG 54:9	-0.298908	-0.870535	-2.91796	-2.22272	-1.33508		-0.260794	-0.430094	-1.57664
		TAG 56:0	0.00033761	0.000322513	0.000356569	0.000536864	0.000386222		0.00165307	0.00101643	0.000754887	0.00108675	0.00186446		0.00034307	0.000392339	0.000312761	0.000319857	0.000411153		TAG 56:0	-10.1957	-10.2617	-10.1168	-9.52646	-10.0016		-7.90393	-8.60558	-9.03475	-8.50906	-7.73033		-10.1725	-9.97891	-10.306	-10.2736	-9.91134		TAG 56:0	-0.995186	-1.06119	-0.916361	-0.325987	-0.801114		1.29654	0.594893	0.165719
		TAG 56:1	0.000939966	0.000771186	0.000378076	0.000258919	0.00011745		0.000438892	0.000833671	0.000284796	0.00675806	0.00577634		0.00534632	0.00214296	0.000547231	0.00705876	0.0116299		TAG 56:1	-8.71841	-9.00393	-10.0323	-10.5785	-11.719		-9.81715	-8.89153	-10.4411	-5.87248	-6.09893		-6.21054	-7.52948	-9.49886	-5.80967	-5.08931		TAG 56:1	-1.61814	-1.90367	-2.93207	-3.47825	-4.6187		-2.71689	-1.79127	-3.34082
		TAG 56:2 (1)	0.0483929	0.0189672	0.00365088	0.00537201	0.00609679		0.0851923	0.10565	0.0164053	0.083119	0.0866622		0.212783	0.17339	0.0513732	0.10472	0.129512		TAG 56:2 (1)	-3.03236	-4.38365	-6.76084	-6.20362	-6.02104		-2.21643	-1.90594	-4.59299	-2.25198	-2.19175		-0.895846	-1.19121	-2.94614	-1.9187	-1.61215		TAG 56:2 (1)	-0.640134	-1.99142	-4.36861	-3.8114	-3.62881		0.175794	0.486292	-2.20077
		TAG 56:3	0.0542231	0.0289725	0.00868397	0.0118882	0.0109197		0.0799598	0.0870938	0.015702	0.161113	0.191696		0.311794	0.173934	0.0557634	0.184364	0.276445		TAG 56:3	-2.86825	-3.77247	-5.51073	-5.05762	-5.18023		-2.30788	-2.18459	-4.65621	-1.29716	-1.04641		-0.344636	-1.18669	-2.82784	-1.10267	-0.518236		TAG 56:3	-1.02275	-1.92698	-3.66523	-3.21213	-3.33473		-0.462387	-0.339092	-2.81072
		TAG 56:4	0.410729	0.105578	0.0300369	0.0192242	0.0298664		0.877313	0.553237	0.106599	0.789384	1.02025		1.80992	1.14143	0.40913	0.96671	1.09776		TAG 56:4	0.0529576	-1.90691	-3.72042	-4.36424	-3.72863		1.14786	0.482668	-1.89304	0.995499	1.36562		2.19263	1.52754	0.0473313	1.28785	1.47126		TAG 56:4	-0.604463	-2.56433	-4.37784	-5.02166	-4.38605		0.490442	-0.174753	-2.55046
		TAG 56:5	0.231891	0.0949625	0.0409574	0.0528212	0.0606798		0.498079	0.339096	0.067457	0.515886	0.624468		1.33784	0.745633	0.235142	0.593023	0.900173		TAG 56:5	-0.771783	-2.0598	-3.27303	-2.90604	-2.70594		0.331146	-0.223534	-2.55319	0.381824	0.657399		1.7566	0.913236	-0.751695	0.582859	1.18497		TAG 56:5	-0.865644	-2.15366	-3.3669	-2.9999	-2.7998		0.237285	-0.317395	-2.64705
		TAG 56:6	0.155195	0.0915202	0.0363888	0.0550675	0.0437261		0.277941	0.153517	0.0273123	0.278511	0.309862		0.840871	0.55081	0.193944	0.426966	0.630551		TAG 56:6	-1.35114	-2.11307	-3.44366	-2.84596	-3.17866		-0.510449	-1.36683	-3.8576	-0.507497	-0.353601		1.08666	0.476326	-1.02959	0.108891	0.671384		TAG 56:6	-0.806754	-1.56868	-2.89927	-2.30157	-2.63427		0.03394	-0.822437	-3.31321
		TAG 56:7	0.151381	0.0806332	0.0356503	0.00553554	0.0110406		0.170892	0.112687	0.0226621	0.11325	0.127073		0.365785	0.282461	0.11036	0.194122	0.261164		TAG 56:7	-1.38705	-2.29578	-3.47324	-6.16036	-5.16434		-1.21214	-1.8129	-4.12688	-1.80572	-1.63958		-0.114235	-0.487179	-1.84302	-1.02826	-0.600274		TAG 56:7	0.151256	-0.757478	-1.93494	-4.62206	-3.62604		0.326165	-0.274596	-2.58857
		TAG 56:8	0.0647225	0.0389927	0.0192908	0.00702029	0.0128719		0.0624186	0.0427159	0.0102993	0.0442009	0.0464727		0.116452	0.0963886	0.0362021	0.0653796	0.0902722		TAG 56:8	-2.61289	-3.34395	-4.35924	-5.81755	-4.94293		-2.66518	-3.21238	-5.26461	-3.16308	-3.09077		-1.7655	-2.03829	-3.45108	-2.59832	-2.13288		TAG 56:8	0.36524	-0.365825	-1.38111	-2.83942	-1.9648		0.312949	-0.234253	-2.28648
		TAG 56:9	0.00916079	0.00664341	0.00326934	0.00547215	0.00663475		0.00811625	0.00630508	0.00176638	0.00870712	0.00761035		0.0176581	0.0137768	0.00366338	0.0086454	0.0163784		TAG 56:9	-5.43361	-5.89716	-6.92009	-6.17698	-5.89904		-5.60827	-5.97257	-7.80829	-5.50689	-5.70112		-4.48683	-4.84491	-6.75591	-5.51715	-4.59537		TAG 56:9	0.150406	-0.313142	-1.33607	-0.592959	-0.315025		-0.0242535	-0.388552	-2.22427
		TAG 58:1	0.00039487	0.00039858	0.000173573	0.000187025	0.00011158		0.000613056	0.00050166	0.000299394	0.00336297	0.00203419		0.00150962	0.000790035	0.000268923	0.00283792	0.00345698		TAG 58:1	-9.96963	-9.95615	-11.1555	-11.0478	-11.7929		-9.335	-9.6243	-10.369	-6.87935	-7.60463		-8.0349	-8.9691	-10.5238	-7.12425	-6.83957		TAG 58:1	-1.51605	-1.50256	-2.70189	-2.5942	-3.33936		-0.881414	-1.17072	-1.91539
		TAG 58:2 (1)	0.014699	0.00943872	0.0015342	0.00420969	0.00355795		0.0212893	0.0423123	0.00953979	0.0483917	0.0344268		0.0644825	0.0636081	0.0224154	0.0557605	0.0529647		TAG 58:2 (1)	-4.75144	-5.39049	-8.0116	-6.55537	-6.79804		-4.21703	-3.22608	-5.37513	-3.0324	-3.52362		-2.61825	-2.63795	-4.14267	-2.82791	-2.90213		TAG 58:2 (1)	-1.02485	-1.6639	-4.28501	-2.82878	-3.07145		-0.490439	0.500511	-1.64854
		TAG 58:3	0.0480905	0.0234895	0.00425497	0.0100446	0.00731463		0.053416	0.0636772	0.0147627	0.0905115	0.0969008		0.188595	0.128075	0.0489924	0.0909982	0.118533		TAG 58:3	-3.0414	-4.07514	-6.53994	-5.30073	-5.7583		-2.88988	-2.63638	-4.7452	-2.12906	-2.03065		-1.06994	-1.62824	-3.0146	-2.12132	-1.73994		TAG 58:3	-0.453293	-1.48703	-3.95183	-2.71262	-3.17019		-0.301774	-0.0482703	-2.15709
		TAG 58:4	0.710231	0.21178	0.0215525	0.0171847	0.0357096		1.09074	0.93569	0.230347	0.539901	0.641146		1.47812	1.27576	0.578861	0.700196	0.635968		TAG 58:4	0.84306	-0.902659	-4.1993	-4.52603	-3.47084		1.46201	1.2408	-0.78142	0.447467	0.695423		1.90046	1.68806	0.547987	0.82253	0.683725		TAG 58:4	0.226878	-1.51884	-4.81549	-5.14222	-4.08703		0.84583	0.62462	-1.3976
		TAG 58:5	0.580771	0.214784	0.0300004	0.053011	0.0841067		0.705118	0.739064	0.174776	0.410719	0.394749		1.27475	1.10231	0.409941	0.552345	0.54064		TAG 58:5	0.552741	-0.882339	-3.72217	-2.90087	-2.23494		0.832635	0.90047	-1.17972	0.052921	-0.00429486		1.68691	1.47722	0.0501875	0.480341	0.44944		TAG 58:5	0.261557	-1.17352	-4.01336	-3.19205	-2.52612		0.541451	0.609286	-1.47091
		TAG 58:6	0.157148	0.067556	0.00950792	0.0508428	0.0561157		0.146111	0.214909	0.0435481	0.109931	0.0883572		0.433593	0.362005	0.0880394	0.156544	0.197241		TAG 58:6	-1.33311	-2.55107	-5.37996	-2.96111	-2.81875		-1.43817	-0.881506	-3.18455	-1.84863	-2.16381		0.131111	-0.129221	-2.16901	-1.33866	-1.00527		TAG 58:6	0.111798	-1.10617	-3.93505	-1.51621	-1.37385		0.00673828	0.5634	-1.73964
		TAG 58:7	0.0234848	0.0173429	0.00507788	0.00040687	0.000408295		0.00443713	0.00371674	0.000567786	0.00350457	0.00342438		0.00800081	0.00770503	0.0023658	0.00418319	0.00528094		TAG 58:7	-4.07543	-4.51281	-6.28486	-9.92644	-9.9214		-6.47946	-6.73505	-9.44567	-6.81985	-6.85324		-5.62894	-5.68329	-7.38676	-6.56448	-6.22829		TAG 58:7	1.97018	1.5328	-0.239246	-3.88083	-3.87579		-0.433846	-0.689435	-3.40006
		TAG 60:2	0.00232249	0.00163093	0.00032559	0.000682845	0.000390008		0.00460112	0.00512914	0.0014881	0.00991216	0.00586932		0.0136419	0.0115366	0.00439661	0.0115436	0.0102405		TAG 60:2	-7.41342	-7.92339	-10.248	-9.17946	-9.98751		-6.4271	-6.27037	-8.05562	-5.31989	-6.07589		-4.85911	-5.10094	-6.49269	-5.10006	-5.27288		TAG 60:2	-1.26478	-1.77475	-4.09932	-3.03082	-3.83888		-0.278466	-0.121735	-1.90698
		TAG 60:3	0.0116308	0.00635271	0.00122681	0.00237087	0.0014011		0.0119403	0.0168216	0.00393367	0.0520423	0.0375689		0.0548187	0.0405159	0.0136631	0.0436559	0.0447248		TAG 60:3	-5.08921	-5.96171	-8.33418	-7.38367	-8.14253		-5.05132	-4.55684	-6.65321	-2.92747	-3.39762		-2.85249	-3.28867	-4.85687	-3.18098	-3.14608		TAG 60:3	-0.973898	-1.8464	-4.21887	-3.26836	-4.02722		-0.936007	-0.441529	-2.5379
		TAG 60:4	0.226891	0.0887434	0.0102759	0.0145431	0.0226263		0.272001	0.377289	0.113517	0.374948	0.315312		0.479008	0.502677	0.230138	0.4129	0.336247		TAG 60:4	-0.803232	-2.15752	-5.26789	-4.76682	-4.12916		-0.541616	-0.0695609	-1.80232	-0.0785401	-0.328449		0.274821	0.344402	-0.782728	0.0605627	-0.235706		TAG 60:4	-0.150326	-1.50461	-4.61498	-4.11391	-3.47625		0.111291	0.583346	-1.14941
		TAG 60:5	0.187574	0.0976082	0.0139288	0.0430675	0.0528895		0.16861	0.31676	0.100786	0.314221	0.238432		0.409914	0.436684	0.176413	0.359577	0.35029		TAG 60:5	-1.07777	-2.02015	-4.82909	-3.20056	-2.90418		-1.23154	-0.321841	-1.97393	-0.333447	-0.731652		0.0500913	0.141359	-1.16627	-0.138928	-0.176678		TAG 60:5	-0.215439	-1.15782	-3.96676	-2.33822	-2.04184		-0.369204	0.540493	-1.1116
		TAG 60:6	0.0376974	0.0273934	0.00467541	0.0358606	0.0317463		0.0282895	0.0810796	0.0271284	0.0798616	0.0546371		0.120482	0.12456	0.0372854	0.0997971	0.140238		TAG 60:6	-3.39269	-3.85333	-6.40399	-3.46476	-3.64057		-3.80689	-2.28782	-3.86736	-2.30966	-2.85728		-1.71641	-1.66838	-3.40855	-1.98816	-1.49736		TAG 60:6	-0.718938	-1.17958	-3.73024	-0.791005	-0.966814		-1.13313	0.385935	-1.1936
	Digalactosyl-Diacylglycerol	DGDG 32:0	0.000608175	0.000848849	0.00342806	0.00446127	0.00531599		0.00074341	0.000412418	0.000310559	0.00129081	0.00131095		0.000488048	0.000270872	0.000183782	0.000738631	0.0006032		DGDG 32:0	-5.8943	-5.41327	-3.39946	-3.0194	-2.76652		-5.60462	-6.45468	-6.86391	-4.80858	-4.78624		-6.21176	-7.06117	-7.62078	-5.61393	-5.90614		DGDG 32:0	-1.2039	-0.722878	1.29094	1.671	1.92388		-0.914228	-1.76428	-2.17352
		DGDG 34:0	0.000102819	0.000160392	0.00059333	0.000981334	0.00108513		0.000317129	0.000174066	0.0001182	0.000550173	0.000517981		0.000283665	0.000138816	0.000112848	0.000467606	0.000314066		DGDG 34:0	-8.45868	-7.81718	-5.92995	-5.20404	-5.05898		-6.83371	-7.69915	-8.25755	-6.0389	-6.12588		-6.99459	-8.02561	-8.32441	-6.27349	-6.84771		DGDG 34:0	-1.93994	-1.29844	0.588795	1.3147	1.45976		-0.31497	-1.1804	-1.73881
		DGDG 34:1	0.00108787	0.00126485	0.00142288	0.00512167	0.00244882		0.00200491	0.000813365	0.000464939	0.00703306	0.00682064		0.00193039	0.000796894	0.000492591	0.00587252	0.00400881		DGDG 34:1	-5.05535	-4.83788	-4.66804	-2.82024	-3.88477		-4.17332	-5.47488	-6.28174	-2.3627	-2.40695		-4.22796	-5.50439	-6.19839	-2.62287	-3.17368		DGDG 34:1	-1.34957	-1.1321	-0.962259	0.885541	-0.178986		-0.467535	-1.7691	-2.57596
		DGDG 34:2	0.0245351	0.0104749	0.00593863	0.0135105	0.011526		0.0428432	0.0207699	0.0107189	0.0505469	0.0486344		0.0474573	0.0206745	0.0166101	0.0526548	0.0302413		DGDG 34:2	-0.56008	-1.78799	-2.60672	-1.42085	-1.65004		0.244141	-0.800434	-1.75477	0.482696	0.427052		0.391705	-0.807071	-1.12286	0.541639	-0.258406		DGDG 34:2	-0.145704	-1.37362	-2.19235	-1.00647	-1.23566		0.658517	-0.386058	-1.34039
		DGDG 34:3	0.043468	0.0578972	0.155468	0.251683	0.276837		0.0903076	0.0696481	0.06507	0.08298	0.128108		0.0298041	0.0203917	0.0177068	0.0283403	0.0260513		DGDG 34:3	0.265027	0.678568	2.10362	2.79861	2.93604		1.31992	0.945159	0.847067	1.19784	1.82436		-0.279414	-0.826942	-1.03062	-0.352073	-0.473571		DGDG 34:3	-1.04329	-0.629749	0.795306	1.49029	1.62772		0.011605	-0.363158	-0.46125
		DGDG 36:1	0.000117278	8.59811e-05	0.000120566	0.000110874	0.000138456		0.000805234	0.000181689	8.77335e-05	0.00126279	0.00153578		0.000826073	0.000335396	0.000154885	0.00170673	0.00119644		DGDG 36:1	-8.26885	-8.71669	-8.22896	-8.34986	-8.02936		-5.48937	-7.63731	-8.68758	-4.84024	-4.55788		-5.45251	-6.75292	-7.86758	-4.40562	-4.9181		DGDG 36:1	-2.30046	-2.7483	-2.26057	-2.38147	-2.06096		0.47902	-1.66891	-2.71919
		DGDG 36:2	0.00221379	0.00095739	0.00056594	0.00103128	0.000933991		0.00656932	0.00210876	0.00114287	0.01283	0.0124594		0.0101363	0.00458943	0.00300819	0.0237799	0.0141478		DGDG 36:2	-4.03033	-5.23967	-5.99813	-5.13241	-5.27537		-2.46111	-4.10046	-4.98419	-1.49541	-1.53769		-1.83539	-2.97854	-3.58796	-0.605181	-1.35435		DGDG 36:2	-1.53866	-2.74801	-3.50646	-2.64074	-2.7837		0.0305597	-1.60879	-2.49252
		DGDG 36:3	0.00782583	0.0102864	0.0351556	0.0606456	0.0637178		0.0287951	0.015045	0.0119507	0.027537	0.0397894		0.0148574	0.00708311	0.00490113	0.0160833	0.0149701		DGDG 36:3	-2.20861	-1.81419	-0.0411697	0.745478	0.816771		-0.329102	-1.26564	-1.59783	-0.393554	0.137458		-1.28375	-2.35247	-2.88374	-1.16936	-1.27284		DGDG 36:3	-1.61127	-1.21685	0.556168	1.34282	1.41411		0.268235	-0.668302	-1.00049
		DGDG 36:4	0.0169318	0.00496852	0.00537688	0.00789909	0.011314		0.027633	0.0171353	0.00420487	0.0178859	0.0106148		0.0283486	0.0487936	0.0296947	0.0458262	0.0204309		DGDG 36:4	-1.09519	-2.86404	-2.75008	-2.19517	-1.67682		-0.388531	-1.07795	-3.10479	-1.0161	-1.76885		-0.35165	0.431766	-0.284719	0.341248	-0.824173		DGDG 36:4	-0.226047	-1.9949	-1.88094	-1.32602	-0.807678		0.480611	-0.208809	-2.23565
		DGDG 36:5	0.0459069	0.017988	0.0172653	0.0171125	0.0182135		0.0892849	0.0676686	0.0277905	0.0499802	0.0448031		0.0535549	0.0844022	0.0588783	0.0566712	0.0451565		DGDG 36:5	0.343785	-1.00789	-1.06705	-1.07988	-0.98992		1.30349	0.903562	-0.380332	0.46643	0.308672		0.566094	1.22236	0.702811	0.64769	0.320008		DGDG 36:5	-0.0126681	-1.36435	-1.4235	-1.43633	-1.34637		0.947038	0.547108	-0.736786
		DGDG 36:6	0.194845	0.268846	0.617104	0.691341	0.788622		0.350482	0.263393	0.211609	0.165853	0.276189		0.0944517	0.10215	0.0827288	0.0477744	0.0713421		DGDG 36:6	2.42933	2.89378	4.09252	4.2564	4.44634		3.27634	2.86422	2.5484	2.19691	2.93266		1.38465	1.49769	1.19346	0.401313	0.979827		DGDG 36:6	-0.532253	-0.0678017	1.13093	1.29482	1.48475		0.314762	-0.0973625	-0.413179
		DGDG 38:4 (1)	0	0	7.41899e-05	0.000231228	0.000297815		0.00106148	0.000720776	0.000399304	0.000464672	0.000599436		0.000553788	0.000451982	0.00027241	0.000458978	0.000275308		DGDG 38:4 (1)	ND	ND	-8.92949	-7.28947	-6.92436		-5.09077	-5.64923	-6.50129	-6.28257	-5.91518		-6.02945	-6.32252	-7.053	-6.30036	-7.03774		DGDG 38:4 (1)	ND	ND	-2.39698	-0.756961	-0.391858		1.44173	0.883276	0.0312131
		DGDG 38:5	0.000794196	0.000357437	0.000566389	0.000121357	0.000115847		0.0010245	0.000681317	0.000225816	0.000488865	0.000556819		0.000728084	0.000808868	0.000552251	0.000710334	0.000656987		DGDG 38:5	-5.50929	-6.66109	-5.99699	-8.21952	-8.28656		-5.14193	-5.73045	-7.32364	-6.20934	-6.02157		-5.63468	-5.48288	-6.03346	-5.67028	-5.78292		DGDG 38:5	0.505947	-0.645859	0.0182459	-2.20429	-2.27132		0.873301	0.284779	-1.3084
		DGDG 38:6	0.00272706	0.00291702	0.0190652	0.015062	0.0208552		0.00495072	0.00365248	0.00251169	0.00162823	0.00395447		0.000891664	0.000722148	0.000475737	0.000468562	0.000597643		DGDG 38:6	-3.72951	-3.63236	-0.923988	-1.26401	-0.794517		-2.86922	-3.30798	-3.84819	-4.47355	-3.19337		-5.34228	-5.64649	-6.24862	-6.27054	-5.9195		DGDG 38:6	-0.976317	-0.87917	1.8292	1.48918	1.95867		-0.116026	-0.554787	-1.095
	Monogalactosyldiacylglycerol	MGDG 36:3 (2)	1.95212e-05	0.000808917	0.00403685	0.0212072	0.0131255		0.000338559	0.00101694	0.00125515	0.00162437	0.00263474		0.000804375	0.000947379	0.000519518	0.000183833	0.000509051		MGDG 36:3 (2)	-11.8595	-6.48665	-4.16748	-1.77423	-2.46641		-7.74323	-6.15647	-5.85285	-5.48083	-4.78305		-6.49477	-6.2587	-7.12547	-8.62424	-7.15483		MGDG 36:3 (2)	-7.38757	-2.01469	0.304472	2.69772	2.00554		-3.27128	-1.68452	-1.3809
		MGDG 36:4 (2)	0.0160155	0.00368376	0.00153923	0.00455756	0.00561897		0.0317847	0.0191467	0.00648774	0.0366862	0.0149968		0.0232976	0.0354526	0.0197926	0.055115	0.0174049		MGDG 36:4 (2)	-2.17931	-4.29953	-5.5585	-3.99245	-3.6904		-1.19045	-1.92169	-3.48299	-0.983545	-2.27413		-1.6386	-1.03289	-1.87382	-0.396337	-2.05929		MGDG 36:4 (2)	-0.279459	-2.39968	-3.65865	-2.0926	-1.79055		0.709405	-0.0218356	-1.58314
		MGDG 36:5	0.0319611	0.0115205	0.0116664	0.0400021	0.0367677		0.0498554	0.0467801	0.0231791	0.0618926	0.036857		0.0237563	0.0491666	0.0361666	0.0469836	0.0286509		MGDG 36:5	-1.18247	-2.65458	-2.63642	-0.858707	-0.980343		-0.541031	-0.632888	-1.64596	-0.229014	-0.976845		-1.61047	-0.561103	-1.00412	-0.626624	-1.3402		MGDG 36:5	-0.158815	-1.63093	-1.61277	0.164943	0.0433071		0.482619	0.390762	-0.622308
		MGDG 36:6	0.175064	0.308966	1.05467	1.49753	1.45592		0.379078	0.356466	0.331644	0.268255	0.488615		0.0580451	0.079633	0.0845847	0.0656049	0.0821442		MGDG 36:6	1.27103	2.09059	3.86186	4.36766	4.327		2.38564	2.29691	2.19278	1.88675	2.75184		-0.321607	0.134584	0.221615	-0.144978	0.179377		MGDG 36:6	-1.34834	-0.528779	1.24249	1.74829	1.70763		-0.233733	-0.322463	-0.426594
		MGDG 38:4	2.41818e-05	0.000100709	0.000311173	0.000454527	0.000707449		0.00111462	0.000798095	0.000579105	0.00065195	0.00109113		0.000395619	0.000392371	0.000277383	0.000444025	0.000370588		MGDG 38:4	-11.5506	-9.49244	-7.86492	-7.31827	-6.68001		-6.02415	-6.50608	-6.96881	-6.79788	-6.05489		-7.51853	-7.53042	-8.03076	-7.352	-7.61282		MGDG 38:4	-4.41032	-2.35212	-0.724602	-0.177949	0.460309		1.11617	0.634243	0.171508
		MGDG 38:5	0.000234807	0.00192631	0.00271709	0.000949028	0.00114163		0.00045006	0.000270664	0.000386661	0.000688159	0.00073007		0.000989536	0.000211898	0.000257061	0.000700372	0.000364595		MGDG 38:5	-8.27116	-5.23487	-4.73865	-6.25619	-5.98961		-7.33252	-8.06614	-7.55157	-6.7199	-6.6346		-6.19589	-8.41927	-8.14053	-6.69452	-7.63634		MGDG 38:5	-1.77068	1.26561	1.76183	0.244294	0.510872		-0.832038	-1.56565	-1.05109
		MGDG 38:6	0.000265996	0.00114412	0.0118257	0.00838136	0.0105369		0.000570624	0.000616157	0.000490924	0.00028306	0.000717379		4.57915e-05	1.58364e-05	2.16406e-05	5.37783e-06	4.00082e-05		MGDG 38:6	-8.09123	-5.98647	-2.61686	-3.11353	-2.78333		-6.9901	-6.87934	-7.20714	-8.00153	-6.6599		-10.6295	-12.1613	-11.7108	-13.7195	-10.8243		MGDG 38:6	-3.1313	-1.02654	2.34308	1.84641	2.1766		-2.03017	-1.91941	-2.24721
	Sulfoquinovosyldiacylglycerol	SQDG 32:0	0.00345	0.011687	0.0526302	0.0288701	0.0347239		0.00350279	0.00288892	0.0028814	0.00478364	0.00541161		0.00145798	0.00105928	0.00137971	0.00182081	0.00177632		SQDG 32:0	-2.16	-0.399765	1.77122	0.904909	1.17126		-2.13809	-2.41607	-2.41983	-1.68849	-1.51054		-3.40263	-3.86351	-3.48224	-3.08202	-3.1177		SQDG 32:0	-1.61324	0.14699	2.31798	1.45166	1.71801		-1.59134	-1.86931	-1.87307
		SQDG 32:3 (1)	2.46725e-05	0.000309066	0.00372593	0.000412023	0.000443655		9.2033e-05	7.82621e-05	6.46459e-05	3.68635e-05	9.66964e-05		1.22473e-05	0	2.52425e-05	7.56244e-06	8.6072e-06		SQDG 32:3 (1)	-9.28755	-5.64061	-2.049	-5.2258	-5.11909		-7.3883	-7.62214	-7.89789	-8.70826	-7.31699		-10.298	ND	-9.2546	-10.9935	-10.8068		SQDG 32:3 (1)	-3.85023	-0.203287	3.38832	0.211523	0.318237		-1.95098	-2.18482	-2.46057
		SQDG 34:0	0.00015176	0.000372362	0.00169437	0.00204334	0.00162938		0.00046373	0.000267706	0.000275671	0.000727551	0.000782087		0.000194076	0.000103699	0.000163005	0.00036635	0.000306199		SQDG 34:0	-6.66674	-5.37182	-3.18585	-2.91567	-3.24227		-5.05524	-5.84787	-5.80558	-4.40548	-4.3012		-6.31191	-7.21613	-6.56361	-5.3953	-5.65406		SQDG 34:0	-2.06743	-0.772517	1.41346	1.68363	1.35703		-0.455936	-1.24857	-1.20627
		SQDG 34:1	0.000665777	0.0010446	0.00462857	0.00775367	0.00449592		0.00438373	0.000995482	0.000646711	0.00568098	0.00914868		0.00127543	0.000581611	0.00039471	0.00287695	0.00241957		SQDG 34:1	-4.53349	-3.88364	-1.73603	-0.991718	-1.77798		-1.81444	-3.95313	-4.5754	-1.44046	-0.753034		-3.59562	-4.72847	-5.28773	-2.42205	-2.67185		SQDG 34:1	-2.23435	-1.58451	0.563103	1.30742	0.52115		0.484696	-1.654	-2.27627
		SQDG 34:2	0.00280772	0.00147705	0.00156855	0.0053904	0.00532063		0.0119747	0.00636404	0.00318873	0.0131689	0.0153773		0.00363585	0.00348571	0.00271474	0.00838242	0.00616936		SQDG 34:2	-2.4572	-3.38388	-3.29716	-1.51621	-1.535		-0.364674	-1.27665	-2.27362	-0.227531	-0.0038677		-2.0843	-2.14514	-2.50578	-0.87923	-1.32148		SQDG 34:2	-1.11192	-2.0386	-1.95189	-0.170927	-0.189723		0.980604	0.0686244	-0.928339
		SQDG 34:3	0.015065	0.0305189	0.161835	0.308079	0.325625		0.0638417	0.0410974	0.0334645	0.021599	0.0513553		0.00508365	0.00492811	0.00453718	0.00452299	0.00489855		SQDG 34:3	-0.0334693	0.985034	3.39178	4.32056	4.40047		2.04983	1.41438	1.11796	0.486297	1.73584		-1.60073	-1.64556	-1.7648	-1.76932	-1.65424		SQDG 34:3	-2.25205	-1.23354	1.1732	2.10198	2.18189		-0.168749	-0.804199	-1.10062
	Phosphatidylglycerol	PG 32:0	0.00296916	0.0180043	0.00784666	0.0049023	0.00962973		0.0056799	0.0118188	0.00934281	0.010883	0.00806988		0.00149576	0.00590404	0.00474112	0.00607935	0.00319301		PG 32:0	-2.57668	0.0235315	-1.17466	-1.85328	-0.879243		-1.64087	-0.583722	-0.922882	-0.702736	-1.13419		-3.56586	-1.58504	-1.90151	-1.54282	-2.47182		PG 32:0	-1.31174	1.28848	0.0902859	-0.588334	0.385702		-0.375927	0.681223	0.342064
		PG 32:1	0.00135359	0.00271313	0.0814094	0.0178764	0.0610843		0.00653291	0.00249085	0.00109941	0.000224438	0.00138404		5.49834e-05	0	0	1.8166e-05	1.54689e-05		PG 32:1	-3.70995	-2.70678	2.20038	0.0132451	1.78599		-1.43901	-2.8301	-4.01001	-6.30235	-3.67785		-8.3316	ND	ND	-9.92935	-10.1612		PG 32:1	-3.11786	-2.11469	2.79248	0.605337	2.37808		-0.846922	-2.23801	-3.41792
		PG 34:0	0.000163821	0.00102354	0.000326178	0.000123789	0.000309859		0.000333331	0.00094952	0.000894625	0.00220201	0.00155678		0.000615687	0.000990544	0.00148913	0.00309823	0.00193165		PG 34:0	-6.75655	-4.11318	-5.76301	-7.16078	-5.83706		-5.73171	-4.22147	-4.30738	-3.00792	-3.50818		-4.84647	-4.16044	-3.57227	-2.51529	-3.1969		PG 34:0	-2.7037	-0.0603299	-1.71016	-3.10794	-1.78421		-1.67886	-0.168623	-0.254537
		PG 34:1	0.00279524	0.00698502	0.0132293	0.0353723	0.0621534		0.00252065	0.0156148	0.0105093	0.0298739	0.0392751		0.000621948	0.00230434	0.00296178	0.0129461	0.00835918		PG 34:1	-2.66376	-1.34247	-0.421074	0.997812	1.81102		-2.81294	-0.181899	-0.75314	0.754075	1.14881		-4.83187	-2.94239	-2.58027	-0.452288	-1.08338		PG 34:1	-2.54985	-1.22856	-0.307156	1.11173	1.92494		-2.69903	-0.0679816	-0.639222
		PG 34:2 (1)	0.0512768	0.0610555	0.0472249	0.0271271	0.0440433		0.0728622	0.0354618	0.0235545	0.0274644	0.0399028		0.0663457	0.0301706	0.0198862	0.0194398	0.0186985		PG 34:2 (1)	1.5335	1.78531	1.41474	0.614924	1.31411		2.04036	1.00145	0.411194	0.632751	1.17168		1.90519	0.768333	0.166955	0.134205	0.0781087		PG 34:2 (1)	0.396032	0.647847	0.277272	-0.52254	0.176648		0.902895	-0.136011	-0.72627
		PG 34:2 (2)	0.000642557	0.000341585	0.0106975	0.0149237	0.0458304		0.00246419	0.00108852	0.000359935	0.000544091	0.00230236		3.82991e-05	1.43563e-05	9.92581e-06	9.52339e-06	7.76209e-06		PG 34:2 (2)	-4.78484	-5.69642	-0.727537	-0.247209	1.37149		-2.84562	-4.02437	-5.62093	-5.02482	-2.94362		-8.85328	-10.2689	-10.8013	-10.861	-11.1561		PG 34:2 (2)	-3.04	-3.95158	1.0173	1.49763	3.11634		-1.10078	-2.27952	-3.87609
		PG 34:3 (1)	0.052634	0.108108	0.138925	0.0338305	0.072965		0.0569779	0.0378801	0.0234864	0.008752	0.0158948		0.0428351	0.0203157	0.0153901	0.00519533	0.00690077		PG 34:3 (1)	1.57119	2.60959	2.97142	0.933515	2.04239		1.68559	1.09663	0.407017	-1.01712	-0.156259		1.27398	0.197784	-0.202809	-1.76952	-1.35998		PG 34:3 (1)	0.302683	1.34109	1.70292	-0.334989	0.773891		0.417088	-0.171873	-0.861486
		PG 34:3 (2)	0.00348275	0.00170656	0.013334	0.0219946	0.0448104		0.0162466	0.00276336	0.00120487	0.000689796	0.00414663		7.25574e-05	0	0	0	8.22062e-06		PG 34:3 (2)	-2.34651	-3.37565	-0.409696	0.312337	1.33902		-0.124674	-2.68031	-3.87786	-4.6825	-2.0948		-7.93147	ND	ND	ND	-11.0733		PG 34:3 (2)	-1.08027	-2.10941	0.856549	1.57858	2.60527		1.14157	-1.41407	-2.61162
		PG 34:4	0.00309709	0.0068555	0.161992	0.070595	0.15081		0.0226631	0.00558415	0.0023278	0.000288926	0.00425771		1.55359e-05	0	0	3.66062e-05	4.7255e-05		PG 34:4	-2.51582	-1.36948	3.19304	1.99476	3.08985		0.355536	-1.6654	-2.92777	-5.93796	-2.05666		-10.155	ND	ND	-8.9185	-8.55013		PG 34:4	-3.20558	-2.05923	2.50328	1.305	2.40009		-0.334223	-2.35516	-3.61753
	Phosphatidylethanolamine	PE 34:1	0.000336109	0.0010664	0.00238854	0.000210801	0.000229278		8.18741e-05	7.21718e-05	0.000209151	0.00195703	0.000886996		0.000341767	2.74618e-05	9.54067e-05	0.00111585	0.00166389		PE 34:1	-6.49127	-4.82552	-3.66214	-7.16432	-7.04311		-8.52872	-8.71069	-7.17565	-3.94961	-5.09127		-6.46719	-10.1047	-8.30804	-4.76013	-4.18371		PE 34:1	-1.08331	0.582436	1.74581	-1.75636	-1.63515		-3.12077	-3.30274	-1.7677
		PE 34:2	0.0658961	0.106048	0.10823	0.0429724	0.0628064		0.0716645	0.0563976	0.0504835	0.0674756	0.0585857		0.0686385	0.0577148	0.0655171	0.0566494	0.0566539		PE 34:2	1.12385	1.8103	1.83968	0.507067	1.05457		1.24492	0.89929	0.739467	1.15802	0.954204		1.18267	0.932596	1.11553	0.905717	0.905829		PE 34:2	-0.0106033	0.675848	0.70523	-0.627385	-0.0798855		0.110463	-0.235162	-0.394986
		PE 34:3	0.0319174	0.0983491	0.0804648	0.0447414	0.0470961		0.0163433	0.0202543	0.026935	0.0112344	0.00639577		0.017602	0.0148117	0.027705	0.0114058	0.00885684		PE 34:3	0.0779989	1.70157	1.41201	0.565267	0.639264		-0.887646	-0.578113	-0.166863	-1.42842	-2.24116		-0.780605	-1.0296	-0.1262	-1.40658	-1.77148		PE 34:3	0.0448297	1.6684	1.37884	0.532098	0.606095		-0.920816	-0.611282	-0.200032
		PE 36:2	0.0009198	0.00416173	0.00277129	0.000543385	0.0007882		0.00170095	0.00076691	0.000777459	0.00304241	0.00306361		0.0031206	0.00111764	0.0011136	0.00490781	0.00504359		PE 36:2	-5.03888	-2.86109	-3.44771	-5.79823	-5.26164		-4.15194	-5.30114	-5.28143	-3.31306	-3.30304		-3.27645	-4.75782	-4.76305	-2.62319	-2.58382		PE 36:2	-1.29433	0.88346	0.296836	-2.05368	-1.51709		-0.407386	-1.55659	-1.53689
		PE 36:3 (1)	0.00156993	0.00241179	0.00877346	0.000142266	0.000207094		0.000214896	0.000401765	0.000503414	0.00293299	0.00154088		0.00167643	0.000106475	0.000109098	0.00171316	0.00231816		PE 36:3 (1)	-4.26757	-3.64817	-1.78513	-7.73161	-7.18992		-7.13656	-6.23385	-5.90846	-3.3659	-4.29451		-4.17288	-8.14968	-8.11457	-4.14162	-3.70529		PE 36:3 (1)	-0.0642738	0.555129	2.41817	-3.52831	-2.98662		-2.93326	-2.03055	-1.70516
		PE 36:3 (2)	0.00016071	0.00382001	0.00035265	0.000885354	0.00092893		0.000354378	0.000164557	0.00031674	1.41301e-05	3.34707e-05		0.000461673	0.00029341	0.000545438	0.000348139	0.00022886		PE 36:3 (2)	-7.55574	-2.9847	-6.42196	-5.09395	-5.02463		-6.41491	-7.52161	-6.5769	-11.0634	-9.81923		-6.03333	-6.68728	-5.79278	-6.44054	-7.04573		PE 36:3 (2)	-1.88575	2.68529	-0.751974	0.576043	0.645357		-0.744924	-1.85163	-0.906913
		PE 36:4	0.102465	0.102002	0.0913227	0.0332799	0.0553724		0.117375	0.0845517	0.055092	0.0694368	0.0685379		0.108282	0.09106	0.0719508	0.0688005	0.0576375		PE 36:4	1.76072	1.75418	1.59463	0.138308	0.872822		1.95671	1.48349	0.865499	1.19936	1.18056		1.84037	1.59047	1.25067	1.18607	0.930664		PE 36:4	0.384779	0.37824	0.218689	-1.23763	-0.503117		0.580774	0.10755	-0.51044
		PE 36:5	0.0970714	0.143423	0.135671	0.0604267	0.0783993		0.0813532	0.0702201	0.0481372	0.0302604	0.0237709		0.0806357	0.0575582	0.0515429	0.0316325	0.044811		PE 36:5	1.6827	2.24586	2.1657	0.998842	1.3745		1.42785	1.21554	0.670809	0.00108804	-0.34715		1.41507	0.928676	0.769429	0.0650635	0.567509		PE 36:5	0.49257	1.05572	0.975566	-0.191289	0.184365		0.237724	0.0254086	-0.519322
		PE 36:6	0.0303026	0.0734924	0.062523	0.0388758	0.0413847		0.0122495	0.0148307	0.0111036	0.00277686	0.00145377		0.0153141	0.00852616	0.00922075	0.00307986	0.00696735		PE 36:6	0.00309803	1.28125	1.04804	0.362527	0.452752		-1.30363	-1.02776	-1.44532	-3.44482	-4.37848		-0.981484	-1.82638	-1.71339	-3.29541	-2.11766		PE 36:6	0.452783	1.73093	1.49773	0.812212	0.902437		-0.853941	-0.578077	-0.995632
	Phosphatidylcholine	PC 32:0	0.000361574	0.00108953	0.00177094	0.00139914	0.00160713		0.000678243	0.00040871	0.000219323	0.000439432	0.000339057		0.000466279	0.000290676	0.000228679	0.000260485	0.000160224		PC 32:0	-7.85479	-6.26346	-5.56264	-5.90261	-5.70267		-6.94728	-7.67801	-8.57603	-7.57344	-7.94755		-7.48789	-8.16967	-8.51576	-8.32788	-9.029		PC 32:0	-0.841617	0.749722	1.45054	1.11056	1.3105		0.0658956	-0.664831	-1.56285
		PC 32:1 (1)	0.000490766	0.000432418	0.00353878	0.00138075	0.000732025		7.44449e-05	6.85143e-05	6.64626e-05	0.00018825	0.000143959		7.91715e-05	0	0	8.84376e-05	0.000115116		PC 32:1 (1)	-7.41405	-7.59666	-4.56391	-5.9217	-6.83719		-10.1348	-10.2546	-10.2985	-8.79643	-9.18343		-10.046	ND	ND	-9.88635	-9.50599		PC 32:1 (1)	-0.00735148	-0.18996	2.84279	1.485	0.569506		-2.72814	-2.84791	-2.89177
		PC 32:2	0.0386679	0.0424415	0.133726	0.00653261	0.00954169		0.0318931	0.0169686	0.00836681	0.00885641	0.00812226		0.0226787	0.0171257	0.0114415	0.00929285	0.00754027		PC 32:2	-1.11409	-0.979754	0.675978	-3.6795	-3.13291		-1.39198	-2.30236	-3.32248	-3.24043	-3.36528		-1.88389	-2.28906	-2.87095	-3.17104	-3.47254		PC 32:2	0.636167	0.770505	2.42624	-1.92924	-1.38265		0.358274	-0.552102	-1.57222
		PC 32:3 (1)	0.00752649	0.0120165	0.0311471	0.00218832	0.00292075		0.00320601	0.00285317	0.00182195	0.000652496	0.00054986		0.00206091	0.00166184	0.00155115	0.000470263	0.000381872		PC 32:3 (1)	-3.47518	-2.80021	-1.42613	-5.25733	-4.84082		-4.70638	-4.87459	-5.52167	-7.00311	-7.25002		-5.34387	-5.65437	-5.75382	-7.47562	-7.77599		PC 32:3 (1)	0.668944	1.34391	2.71799	-1.11321	-0.696695		-0.562253	-0.730467	-1.37755
		PC 32:3 (2)	0.097941	0.0237874	0.0555476	0.00194194	0.0137238		0.074367	0.0192622	0.00561239	0.0080837	0.00995227		0.0306702	0.0152511	0.00741138	0.00602048	0.0042165		PC 32:3 (2)	0.226685	-1.81503	-0.591504	-5.42966	-2.60855		-0.170565	-2.11946	-3.89854	-3.37214	-3.07213		-1.44839	-2.45632	-3.49741	-3.79728	-4.31111		PC 32:3 (2)	1.97465	-0.0670622	1.15646	-3.68169	-0.860579		1.5774	-0.37149	-2.15057
		PC 34:1	0.00971634	0.0253162	0.0946741	0.0174574	0.0100846		0.0021003	0.00622721	0.00996356	0.0634832	0.0414204		0.0106106	0.00101015	0.00244872	0.0323498	0.0407622		PC 34:1	-3.10674	-1.72517	0.177742	-2.26139	-3.05307		-5.31656	-3.74857	-3.07049	-0.398853	-1.01489		-2.97973	-6.37259	-5.09513	-1.37147	-1.038		PC 34:1	-1.33479	0.0467917	1.9497	-0.489434	-1.28112		-3.5446	-1.97661	-1.29854
		PC 34:2	0.463896	0.542241	0.675867	0.358512	0.466251		0.601895	0.403416	0.298841	0.429364	0.434537		0.46964	0.372592	0.332477	0.377982	0.321662		PC 34:2	2.4705	2.69563	3.01344	2.09872	2.47781		2.84621	2.26897	1.83608	2.3589	2.37618		2.48826	2.1543	1.98995	2.17502	1.94225		PC 34:2	0.0874499	0.312583	0.630389	-0.284328	0.0947563		0.463162	-0.114083	-0.546972
		PC 34:3	0.427126	0.675089	0.628896	0.57448	0.667007		0.376895	0.330759	0.278035	0.19309	0.148339		0.313692	0.213776	0.234907	0.12141	0.0926563		PC 34:3	2.35136	3.01178	2.90952	2.77896	2.9944		2.17086	1.98248	1.73197	1.20597	0.825594		1.90605	1.3528	1.48879	0.536593	0.146661		PC 34:3	0.280136	0.940554	0.838296	0.707732	0.923177		0.099636	-0.0887439	-0.339257
		PC 34:4 (1)	0.000663914	0.000955331	0.00171177	0.00226688	0.00216755		8.0264e-05	0.000297982	0.000686631	0.000853389	0.000466572		0.000956915	0.000143411	0.000360813	0.000946917	0.00119872		PC 34:4 (1)	-6.97809	-6.45308	-5.61167	-5.20645	-5.27109		-10.0263	-8.13386	-6.92955	-6.61588	-7.48698		-6.45069	-9.18892	-7.85783	-6.46585	-6.12567		PC 34:4 (1)	-0.466142	0.0588635	0.900278	1.3055	1.24086		-3.51431	-1.62191	-0.417603
		PC 34:4 (2)	0.000655281	0.000729141	0.000730325	0.000350118	0.00048378		0.00386631	0.00187357	0.000972266	0.000242477	0.000145308		0.000637675	0.0010805	0.000906592	0.000128579	0.000152706		PC 34:4 (2)	-6.99697	-6.84289	-6.84055	-7.90124	-7.43473		-4.4362	-5.48137	-6.42773	-8.43124	-9.16997		-7.03626	-6.27545	-6.52863	-9.34643	-9.09833		PC 34:4 (2)	-0.398318	-0.244234	-0.241894	-1.30259	-0.836081		2.16245	1.11728	0.170919
		PC 36:1	0.000479725	0.00137471	0.00600814	0.000723469	0.000584462		0.00160379	0.0012475	0.00134015	0.00654307	0.0060552		0.00223381	0.00172259	0.00145215	0.00764561	0.00872117		PC 36:1	-7.44688	-5.92803	-3.80024	-6.85415	-7.16198		-5.70567	-6.06812	-5.96476	-3.67719	-3.78898		-5.22765	-5.60257	-5.84897	-3.45252	-3.26263		PC 36:1	-2.72982	-1.21097	0.916817	-2.1371	-2.44492		-0.988616	-1.35106	-1.2477
		PC 36:2	0.0167703	0.046778	0.0670216	0.0160912	0.0198424		0.0272279	0.0139462	0.0137306	0.0700351	0.0932639		0.0486958	0.0160108	0.012733	0.098701	0.0946059		PC 36:2	-2.31932	-0.839397	-0.320602	-2.37896	-2.07664		-1.62014	-2.58535	-2.60783	-0.257151	0.156091		-0.781429	-2.38618	-2.71666	0.237837	0.176702		PC 36:2	-1.38162	0.0983	0.617094	-1.44126	-1.13895		-0.682448	-1.64766	-1.67014
		PC 36:3	0.00530448	0.0616643	0.0331245	0.0360503	0.0444237		0.0119063	0.00723246	0.00965316	0.00377117	0.00881029		0.0153501	0.00749656	0.00845455	0.0100528	0.00471154		PC 36:3	-3.97995	-0.440792	-1.33733	-1.21522	-0.9139		-2.8135	-3.53267	-3.11616	-4.47214	-3.24797		-2.44698	-3.48093	-3.30743	-3.05763	-4.15096		PC 36:3	-1.75202	1.78713	0.890594	1.01271	1.31403		-0.58558	-1.30474	-0.888231
		PC 36:4	0.529491	0.54356	0.507583	0.147362	0.250503		0.708805	0.375576	0.223597	0.319965	0.386364		0.518217	0.359882	0.244479	0.270031	0.250608		PC 36:4	2.66131	2.69914	2.60034	0.816065	1.58153		3.08209	2.16581	1.4176	1.93461	2.20666		2.63026	2.10423	1.54641	1.68982	1.58213		PC 36:4	0.494891	0.532725	0.433929	-1.35035	-0.584889		0.915674	-0.000609402	-0.748812
		PC 36:5	0.541345	0.750879	0.793493	0.371466	0.492616		0.556161	0.35749	0.244837	0.194019	0.185888		0.498503	0.298067	0.241871	0.164176	0.198881		PC 36:5	2.69325	3.16528	3.24492	2.14993	2.55716		2.7322	2.0946	1.54852	1.2129	1.15113		2.5743	1.83233	1.53094	0.971947	1.2486		PC 36:5	0.463318	0.93535	1.01499	-0.0799987	0.327235		0.502272	-0.135326	-0.681409
		PC 36:6	0.18998	0.464935	0.473213	0.450772	0.592718		0.153192	0.127997	0.112412	0.0440519	0.0304773		0.168773	0.0829063	0.0872823	0.0305399	0.0417912		PC 36:6	1.18255	2.47373	2.49919	2.4291	2.82405		0.872039	0.612811	0.4255	-0.926025	-1.4575		1.01178	-0.0137471	0.0604606	-1.45453	-1.00203		PC 36:6	-0.098493	1.19269	1.21815	1.14806	1.54301		-0.408999	-0.668227	-0.855539
		PC 38:2 (2)	0.00331601	0.00155287	0.00178229	0.000197664	0.000329485		0.00797079	0.00116052	0.000392207	0.0016263	0.00541907		0.00993973	0.00159841	0.000634767	0.00273473	0.00354206		PC 38:2 (2)	-4.65771	-5.75222	-5.55342	-8.72604	-7.98887		-3.39243	-6.17239	-7.73747	-5.68557	-3.94911		-3.07395	-5.71052	-7.04286	-4.93576	-4.56257		PC 38:2 (2)	0.237274	-0.857237	-0.65844	-3.83106	-3.09389		1.50255	-1.2774	-2.84249
		PC 38:3 (1)	0.00233055	0.00695427	0.0115427	5.83246e-05	0.000118363		0.00312338	0.00157892	0.00090188	0.00125061	0.00280301		0.00199927	0.0025677	0.00142506	0.00188001	0.00509914		PC 38:3 (1)	-5.16648	-3.58926	-2.85825	-10.4869	-9.46586		-4.74405	-5.72822	-6.53615	-6.06453	-4.90018		-5.38768	-5.02668	-5.87613	-5.47641	-4.0369		PC 38:3 (1)	-0.319792	1.25744	1.98845	-5.64022	-4.61917		0.102643	-0.881524	-1.68946
		PC 38:3 (2)	0.00133421	0.00156211	0.00135859	0.000496206	0.000556025		0.00252016	0.000586811	0.00029976	0.000292759	0.00086122		0.00414646	0.000467111	0.000291574	0.00031016	0.000498314		PC 38:3 (2)	-5.97117	-5.74366	-5.94505	-7.39814	-7.23393		-5.05364	-7.15619	-8.12528	-8.15937	-6.6027		-4.33528	-7.48532	-8.16522	-8.07607	-7.39203		PC 38:3 (2)	0.361114	0.588631	0.38724	-1.06586	-0.901647		1.27864	-0.8239	-1.79299
		PC 38:4 (1)	0.00678288	0.0081846	0.0151715	0.000309822	0.00221806		0.00507676	0.00144794	0.000458653	0.00191806	0.00419473		0.00446411	0.00193183	0.000940722	0.00289782	0.0039217		PC 38:4 (1)	-3.62526	-3.35424	-2.46387	-8.07764	-5.23786		-4.04325	-5.85315	-7.51168	-5.44751	-4.31858		-4.22879	-5.43719	-6.47532	-4.85219	-4.41568		PC 38:4 (1)	0.763843	1.03486	1.92524	-3.68854	-0.848756		0.345854	-1.46405	-3.12258
		PC 38:5 (1)	0.00751746	0.0162878	0.0266967	0.00199386	0.00489441		0.0050237	0.00227832	0.00110458	0.00116288	0.00132024		0.00443665	0.0020424	0.00135312	0.00105567	0.00118817		PC 38:5 (1)	-3.47691	-2.36144	-1.64857	-5.39159	-4.09602		-4.05841	-5.19918	-6.24366	-6.16945	-5.98636		-4.23768	-5.35689	-5.95086	-6.309	-6.13841		PC 38:5 (1)	0.525164	1.64064	2.35351	-1.38952	-0.0939465		-0.056331	-1.19711	-2.24158
		PC 38:5 (2)	0.000135665	0.000119158	0.000770299	0.00368013	0.00377204		0.00176301	0.00130374	0.00112548	0.000760956	0.00143078		0.000231696	0.00034725	0.00031099	0.000235841	0.000213223		PC 38:5 (2)	-9.26904	-9.45621	-6.76367	-4.5074	-4.47181		-5.56911	-6.0045	-6.21661	-6.78127	-5.87035		-8.49685	-7.91311	-8.07221	-8.47127	-8.61672		PC 38:5 (2)	-2.99294	-3.18011	-0.487564	1.7687	1.80429		0.706988	0.271601	0.0594912
		PC 38:6	0.0018534	0.0037058	0.0046402	0.00240859	0.00303311		0.000494308	0.000270488	0.000160345	9.52658e-05	4.15288e-05		0.000570279	0.000231246	0.000185336	0.000118813	8.48276e-05		PC 38:6	-5.49698	-4.49737	-4.17297	-5.11897	-4.78636		-7.40367	-8.27352	-9.02791	-9.77905	-10.9769		-7.19742	-8.49966	-8.81894	-9.46039	-9.94648		PC 38:6	0.635697	1.63531	1.95971	1.01371	1.34632		-1.27099	-2.14084	-2.89523
	Phosphatidylserine	PS 36:1	0.00153968	0.00175429	0.00417932	0.000470188	0.000949377		0.00149131	0.00101819	0.000597062	0.00057588	0.00067396		0.00103623	0.000930561	0.000696181	0.00054487	0.000470156		PS 36:1	-3.83037	-3.64211	-2.38973	-5.54169	-4.52794		-3.87641	-4.42699	-5.19704	-5.24915	-5.02226		-4.40165	-4.55682	-4.97546	-5.32901	-5.54178		PS 36:1	0.448244	0.636501	1.88888	-1.26308	-0.249332		0.402195	-0.148381	-0.918434
		PS 36:2	0.00138651	0.00236989	0.00556723	0.000373331	0.000492576		0.000666178	0.000572718	0.000357702	0.000120325	9.681e-05		0.00041944	0.000343706	0.000329915	8.02456e-05	6.08948e-05		PS 36:2	-3.98153	-3.20817	-1.97604	-5.87447	-5.47458		-5.03902	-5.2571	-5.93617	-7.50799	-7.8217		-5.70646	-5.99375	-6.05283	-8.09243	-8.49053		PS 36:2	0.651797	1.42516	2.65729	-1.24114	-0.841247		-0.405686	-0.623768	-1.30284
		PS 38:0	0.00213153	0.00506334	0.0160786	0.00344256	0.002393		0.000445857	0.00133503	0.00202081	0.0110529	0.0075323		0.00213292	0.000228187	0.00058554	0.00619606	0.00777161		PS 38:0	-3.3611	-2.1129	-0.445921	-2.66951	-3.19418		-5.61834	-4.03613	-3.43806	-0.986648	-1.5399		-3.36016	-6.58471	-5.22516	-1.82164	-1.49478		PS 38:0	-1.09736	0.150841	1.81782	-0.405768	-0.930431		-3.3546	-1.77238	-1.17432
		PS 38:1	0.0553971	0.0589531	0.0655569	0.0376159	0.0539512		0.0670598	0.0512537	0.0393943	0.0568244	0.0536352		0.0585695	0.0472972	0.0464519	0.0518773	0.0452746		PS 38:1	1.33874	1.4285	1.58168	0.780274	1.30059		1.61438	1.22659	0.846919	1.37544	1.29211		1.41908	1.11069	1.08467	1.24404	1.04764		PS 38:1	0.0745437	0.164299	0.31748	-0.483927	0.0363873		0.35018	-0.0376113	-0.417282
		PS 38:2	0.0618222	0.0832863	0.0878371	0.0877829	0.104143		0.0592672	0.0525228	0.0426019	0.0319742	0.026216		0.0502207	0.0355916	0.0389703	0.0221349	0.0164437		PS 38:2	1.49706	1.92701	2.00376	2.00287	2.24943		1.43617	1.26188	0.959849	0.545839	0.259379		1.19722	0.70047	0.831308	0.0152549	-0.41353		PS 38:2	0.211618	0.641573	0.718324	0.717434	0.963992		0.150727	-0.0235635	-0.32559
		PS 40:0	8.75399e-05	0.000265074	0.00127032	0.000153304	0.000129424		0.000373156	0.000300489	0.000321212	0.0014884	0.0013542		0.000491875	0.000371211	0.00032328	0.00163618	0.00176748		PS 40:0	-7.96691	-6.36853	-4.1078	-7.15853	-7.40281		-5.87514	-6.18761	-6.0914	-3.87923	-4.01555		-5.47663	-5.88268	-6.08214	-3.74266	-3.6313		PS 40:0	-2.97623	-1.37785	0.882874	-2.16785	-2.41213		-0.884464	-1.19693	-1.10072
		PS 40:1	0.00277628	0.00694686	0.0101196	0.00227931	0.00309217		0.00533112	0.002785	0.00267993	0.0111197	0.0145869		0.00866708	0.00317678	0.00261258	0.0157072	0.0152868		PS 40:1	-2.97984	-1.65663	-1.11392	-3.2644	-2.82438		-2.03856	-2.97532	-3.0308	-0.977953	-0.586396		-1.33745	-2.78543	-3.06752	-0.47964	-0.518782		PS 40:1	-1.36368	-0.0404684	0.502245	-1.64823	-1.20821		-0.42239	-1.35915	-1.41463
		PS 40:2	0.000827025	0.00966062	0.00403638	0.00658778	0.00796691		0.0022663	0.00138212	0.00183157	0.000522139	0.00151226		0.00268745	0.00149928	0.00169091	0.00194052	0.000987159		PS 40:2	-4.72699	-1.18088	-2.43993	-1.7332	-1.45898		-3.27266	-3.98611	-3.57991	-5.39049	-3.85629		-3.02676	-3.86872	-3.69519	-3.49655	-4.47164		PS 40:2	-1.87168	1.67444	0.415382	1.12211	1.39634		-0.417344	-1.13079	-0.724596
		PS 40:3	0.0596172	0.0564537	0.063956	0.0161364	0.0287915		0.0783996	0.048231	0.0307429	0.0383698	0.0531845		0.0650241	0.0439741	0.0334426	0.0340672	0.0329402		PS 40:3	1.44466	1.366	1.54601	-0.440752	0.394575		1.83978	1.13889	0.489187	0.808905	1.27994		1.56991	1.00559	0.610621	0.637317	0.588782		PS 40:3	0.388107	0.309446	0.489457	-1.49731	-0.661979		0.783224	0.0823398	-0.567368
		PS 40:4	0.0724944	0.0954049	0.0837726	0.0251545	0.039186		0.0644302	0.043549	0.0304591	0.0255138	0.0200938		0.0737728	0.0453554	0.0372486	0.0259784	0.0305419		PS 40:4	1.7268	2.123	1.93541	0.199747	0.839273		1.55667	0.991572	0.475806	0.22021	-0.124316		1.75202	1.05021	0.76612	0.246247	0.479721		PS 40:4	0.60902	1.00521	0.81763	-0.918035	-0.278509		0.438887	-0.12621	-0.641976
		PS 40:5	0.0287838	0.0628924	0.0483811	0.0376703	0.0447082		0.0198579	0.0183985	0.0186247	0.00777654	0.00498564		0.0301791	0.0146549	0.0157275	0.00584574	0.0076682		PS 40:5	0.39419	1.52182	1.14337	0.782362	1.02947		-0.141357	-0.251481	-0.233853	-1.49387	-2.13522		0.462481	-0.579685	-0.477773	-1.90561	-1.51411		PS 40:5	0.237767	1.3654	0.986953	0.62594	0.873049		-0.29778	-0.407903	-0.390275
	Phosphatidylinositol	PI 34:2	0.0236558	0.0304674	0.0230319	0.00228149	0.0123849		0.0477982	0.0323554	0.0203988	0.0436127	0.0391999		0.0217831	0.0235255	0.0218132	0.0343536	0.025589		PI 34:2	0.767246	1.13232	0.72869	-2.6069	-0.166369		1.78201	1.21906	0.553535	1.6498	1.4959		0.648263	0.759277	0.650254	1.30552	0.880578		PI 34:2	-0.180941	0.184131	-0.219496	-3.55508	-1.11456		0.833825	0.270873	-0.394651
		PI 34:3	0.0285057	0.0536192	0.0272066	0.00632046	0.0197158		0.0478532	0.0442229	0.0301099	0.022652	0.0171604		0.0232182	0.024335	0.0234083	0.0158014	0.0163501		PI 34:3	1.0363	1.9478	0.969012	-1.13684	0.504405		1.78367	1.66985	1.11529	0.70469	0.304136		0.740311	0.808085	0.752076	0.185103	0.234353		PI 34:3	0.0944861	1.00599	0.027194	-2.07866	-0.437413		0.841851	0.728029	0.173472
		PI 36:5	0.00120814	0.00493596	0.00467931	0.000215117	0.000874492		0.00124709	0.00160338	0.00190408	0.00105341	0.000660394		0.000529469	0.00118705	0.00155896	0.000655466	0.000684377		PI 36:5	-3.52409	-1.49354	-1.57058	-6.01368	-3.99036		-3.47831	-3.11575	-2.86778	-3.72181	-4.39548		-4.71426	-3.54949	-3.15629	-4.40628	-4.34401		PI 36:5	-0.343679	1.68687	1.60983	-2.83327	-0.809946		-0.297903	0.0646564	0.312628
		PI 36:6	0.000383278	0.00205212	0.00191608	0.000320383	0.00066706		0.000320299	0.000590628	0.000795361	0.000168345	7.76002e-05		0.00010776	0.000267585	0.000400215	6.88077e-05	5.76654e-05		PI 36:6	-5.18041	-2.75976	-2.85872	-5.439	-4.38099		-5.43938	-4.55655	-4.12719	-6.36738	-7.48467		-7.01098	-5.6988	-5.11803	-7.65816	-7.91302		PI 36:6	-0.511069	1.90958	1.81062	-0.769662	0.288355		-0.770041	0.112789	0.542148
[truncated: 23 more columns]
